# Supplementary material
Source: publisher site journal article supplement (https://www.dovepress.com/article/576674)
Supplement: Supplementary file 1 [file 576674%20Supplementary%20Material.docx]

### Supplementary Information

### Supplementary material 1

###
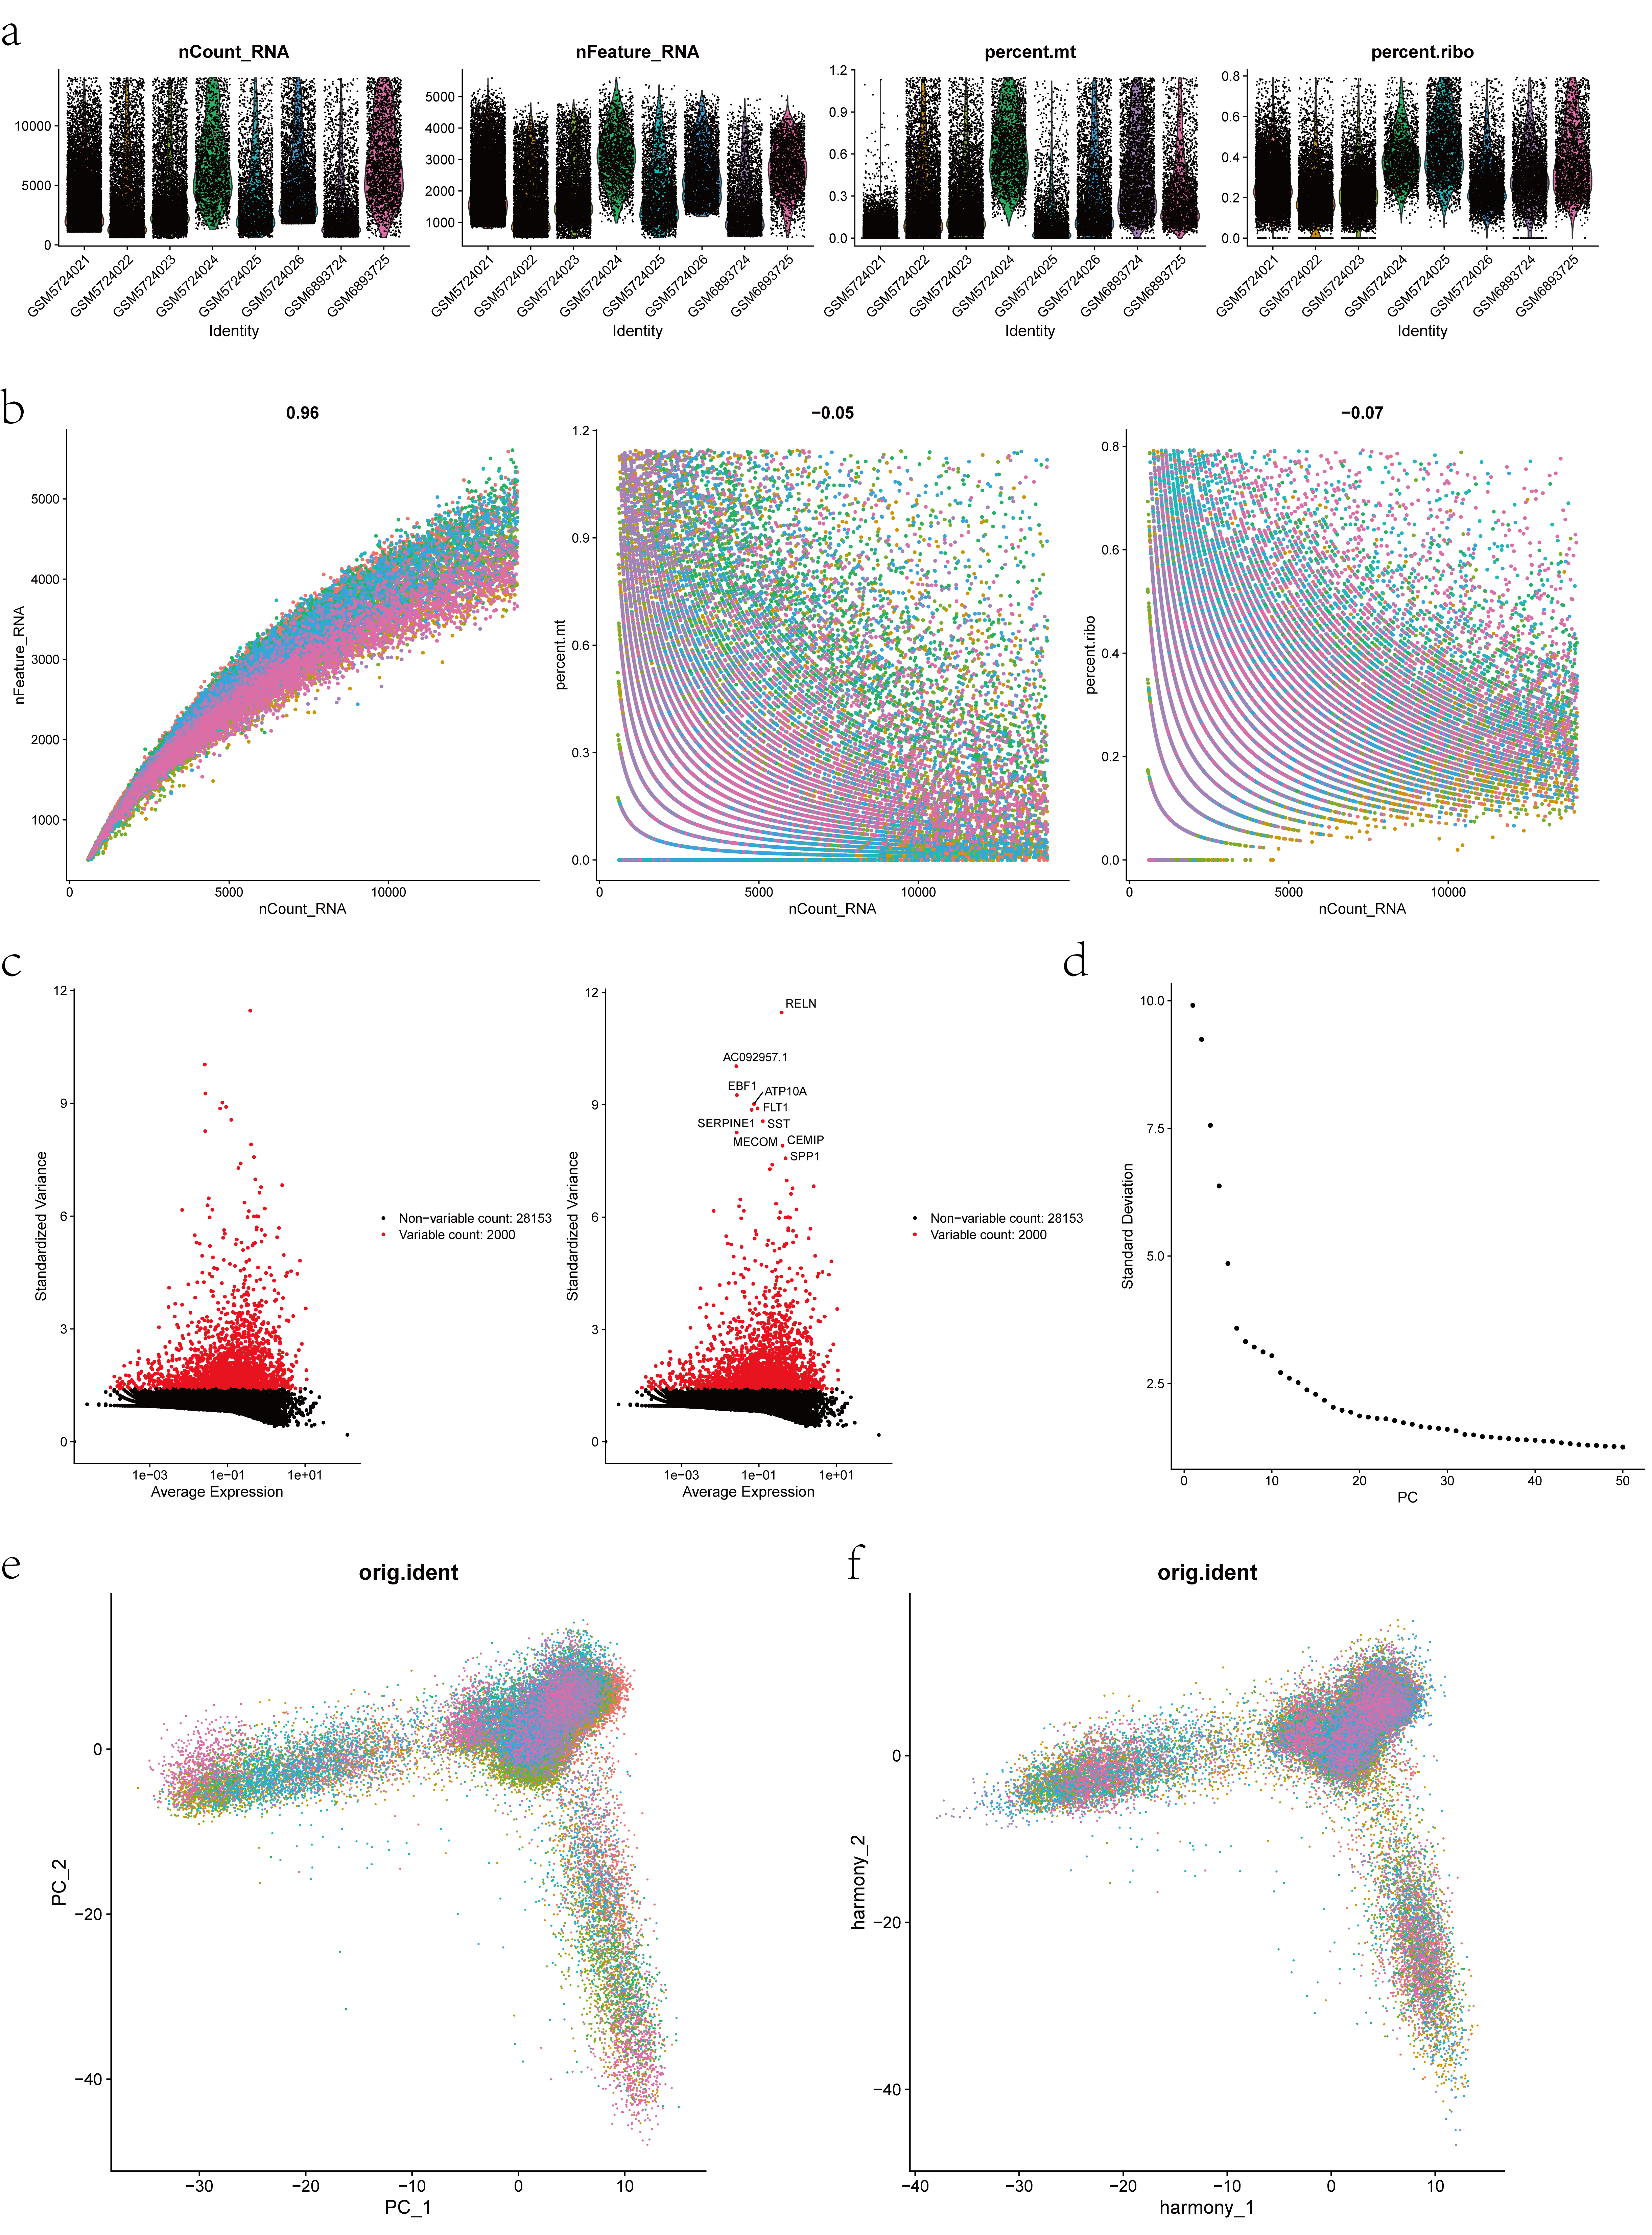


### Figure S1 **Key visualizations for** **single-nucleus RNA sequencing (snRNA-seq) data preprocessing and integration.** a Quality control for snRNA-seq data. b Validation of gene expression correlations. c Gene expression heterogeneity analysis. d Principal component analysis (PCA) variance contribution. e–f Visualization of dimensionality reduction via PCA and Harmony.

### Supplementary material 2

### Table S1 Drug prediction

| Gene | Drug |  |  |
| --- | --- | --- | --- |
| ATM | AVELUMAB  BERZOSERTIB  INDISULAM  DURVALUMAB  EVEROLIMUS  CHEMBL601933  PERMETHRIN  CHEMBL1519374  ENPIROLINE  ELIMUSERTIB  CERALASERTIB  VANDETANIB  KU-0060648  OLAPARIB  VELIPARIB  ETOPOSIDE  NIVOLUMAB  IPILIMUMAB  CHEMBL299853  CHEMBL1329443  MITOTANE  AZD1390  CISPLATIN  PACLITAXEL  STREPTONIGRIN  FLUOROURACIL  PHLORETIN  KU-55933 | VENETOCLAX  IBRUTINIB  OXALIPLATIN  CHEMBL375673  KU-60019  BENDAMUSTINE  ENZALUTAMIDE  CHEMBL606460  PREDNISONE  AZD6482  SCHISANHENOL  E-7820  NAFTIFINE  NIRAPARIB  TALAZOPARIB  TUVUSERTIB  CHEMBL374632  CAMONSERTIB  PJ34  ISOVELLERAL  AZD0156  BINIMETINIB  HEPTACHLOR  CHEMBL74852  DIPYRIDAMOLE  FLUDARABINE  NU-7441 | DOXORUBICIN-HYDROCHLORIDE  PROTOPORPHYRIN-DISODIUM  ABIRATERONE ACETATE  TRAMETINIB- DIMETHYL SULFOXIDE  PEGYLATED SN-38- CONJUGATE PLX038  CYCLOPHOSPHAMIDE-ANHYDROUS  METHYLENE BLUE-ANHYDROUS  PARP/TANKYRASE-INHIBITOR 2X-121  FLUNARIZINE-DIHYDROCHLORIDE  IRINOTECAN-HYDROCHLORIDE  ESTRADIOL 3-BENZOATE  LEUCOVORIN CALCIUM  RUCAPARIB  AZD7648  ATM INHIBITOR M 3541  VALPROIC ACID  CHEMBL578061  CAPECITABINE  TEMOZOLOMIDE  SELUMETINIB  DITHIAZANINE IODIDE  ATR INHIBITOR ART0380  TOLONIUM CHLORIDE |
| TGFBR1 | VACTOSERTIB  LY-2382770  METELIMUMAB | TGFBETA INHIBITOR- LY3200882  HESPERADIN | 4-(3-PYRIDIN-2-YL-1H-PYRAZOL-4-YL) QUINOLINE  GALUNISERTIB |
| ZEB1 | SALINOMYCIN | OXALIPLATIN | DOXORUBICIN- HYDROCHLORIDE |
| GJA1 | SELENIUM  CARVEDILOL  LABETALOL  ASCORBIC ACID | BLEOMYCIN  VITAMIN A  ATENOLOL  PROTEASE INHIBITOR | PROPYLTHIOURACIL  PROTEASOME INHIBITOR  EPIGALLOCATECHIN- GALLATE |
| ALOX5 | BALSALAZIDE  MASOPROCOL  DARBUFELONE  MECLOFENAMATE  CGP 47656  TEPOXALIN  MESALAMINE  CHEMBL416038  PF-4191834  PTC299  METHOTREXATE  ANACARDIC ACID | 6BIO  ZILEUTON  ATRELEUTON  CHEMBL502496  TENIDAP  SULFASALAZINE  ACACETIN  LICOFELONE  TIPELUKAST  5-OXO-ETE  SILYMARIN  SELENIUM | MELATONIN  MECLOFENAMATE SODIUM  THERAPEUTIC- GLUCOCORTICOID  MONTELUKAST SODIUM  BALSALAZIDE DISODIUM  LESOGABERAN  ATRELEUTON  RILOPIROX  DIETHYLCARBAMAZINE  OLSALAZINE SODIUM |
